# Supplementary material for: Genetic Biomarkers of Barrett’s Esophagus Susceptibility and Progression to Dysplasia and Cancer: A Systematic Review and Meta-Analysis
Source: Springer Nature journal article supplement (doi:10.1007/s10620-015-3884-5), 2015-10-07
Supplement: MOESM1 [file 8877726]

Supplementary table 1. Modified ASCO quality criteria of biomarker studies

| Element | A  Prospective | B  Prospective using archived samples | C  Prospective / observational | D  Retrospective / observational |
| --- | --- | --- | --- | --- |
| Clinical trial | PCT designed to address marker | Prospective trial not designed to address marker, but design accommodates marker utility. Accommodation of predictive marker requires PRCT | Prospective observational registry, treatment and follow-up  not dictated | No prospective aspect |
| Patients and data | Prospectively enrolled, treated, and followed in PCT | Prospectively enrolled, treated,  and followed in PCT, or (for predictive marker) a PRCT | Prospectively enrolled in registry, but treatment and follow-up not stipulated | No prospective stipulation of treatment or follow-up; data collected retrospectively |
| Specimen collection, processing, and archival | Specimens collected, processed  and assayed in real time | Specimens collected, processed, and archived prospectively using generic SOPs. Assayed after trial completion | Specimens collected, processed, and archived prospectively using generic SOPs. Assayed after trial completion | Specimens collected, processed and archived with no prospective SOPs |
| Statistical design and analysis | Study powered to address marker question | Study powered to address therapeutic question; underpowered to address marker. Focused analysis plan for marker developed before doing assays | Study not prospectively powered. Retrospective design confounded by selection of specimens for study Focused analysis plan for marker question developed before doing  assays | Study not prospectively powered. Retrospective design confounded by selection of specimens for study. No focused analysis  plan for marker question |
| Validation | Result unlikely to be due to chance. Although preferred, validation not required | Result more likely to due to chance that A but less likely than C. Requires one or more validation studies | Result very likely to due to chance. Requires subsequent validation studies | Result very likely to be due to chance. Requires subsequent validation |

PRCT=prospective randomised controlled trial; PCT=prospective controlled trial; SOPs=standardized operating procedure

Supplementary table 2. ASCO Levels of evidence

| Level of evidence | Category from table 1 | Validation studies available |
| --- | --- | --- |
| I | A | None required |
| I | B | At least one, with consistent results |
| II | B | None, or inconsistent results |
| II | C | At least two, with consistent results |
| III | C | None, or one with consistent or inconsistent results |
| IV & V | D | NA |

NA—not applicable; LOE IV and V studies unsuitable for clinical utility

Supplementary table 3. Modified REMARK guidelines for study quality assessment

| Criterion | 1 point for each criterion; 0.5 points if all sub-criteria not fulfilled |
| --- | --- |
| Introduction | |
| 1 | State:   - the marker(s) examined - the study objectives - any pre-specified hypotheses. |
| Methods: patients | |
| 2 | Describe   - the characteristics (e.g. disease stage or comorbidities) of the study patients - their source and inclusion and exclusion criteria. |
| 3 | Describe   - treatment(s) received and - how chosen (e.g. randomized or rule-based) - (NA for observational studies of susceptibility/progression) |
| Methods: specimen characteristics | |
| 4 | Describe   - type of biological material used (including control samples) - methods of preservation and storage. |
| Methods: assay(s) | |
| 5 | Specify   - the assay method used and provide (or reference) a detailed protocol, including specific reagents or kits used, - whether and how assays were performed blinded to the study end point. |
| 6 | Specify   - quality control procedures (e.g. Hardy-Weinberg equilibrium, minimum genotyping call rate) if applicable to variant assessed - reproducibility assessments, quantitation methods, and scoring and reporting protocols |
| Methods: study design | |
| 7 | State   - the method of case selection, including whether prospective or retrospective - whether stratification or matching (e.g. by stage of disease or age) was employed. |
| 8 | Define all clinical end points examined. |
| 9 | List all candidate variables initially examined or considered for inclusion |
| 10 | Give rationale for sample size; if the study was designed to detect a specified effect size, give the target power and effect size. |
| Methods: statistical analysis | |
| 11 | Specify   - all statistical methods, including - adjustment procedures for multiple comparisons |
| 12 | Clarify how marker values were handled in the analyses; if relevant, describe methods used for cutpoint determination. |
| Results - data | |
| 13 | Describe   - the flow of patients through the study, including the number of patients included in each stage of the analysis and reasons for dropout. - report the numbers of patients and the number of events, both overall and for each subgroup examined |
| 14 | Report the distributions of   - basic demographic characteristics (at least age and sex) - standard (disease-specific) prognostic variables - marker, including numbers of missing values. |
| Analysis and presentation | |
| 15 | Show the relation of the marker to standard prognostic variables. |
| 16 | Present univariate analyses showing the relation between the marker and outcome, with the estimated effect (e.g. hazard ratio and survival probability). Preferably provide similar analyses for all other variables being analyzed. For the effect of a tumor marker on a time-to-event outcome, a Kaplan–Meier plot is recommended. |
| 17 | For key multivariable analyses, report   - estimated effects (e.g. odds ratio) with confidence intervals for the marker - and, at least for the final model, all other variables in the model. |
| 18 | Among reported results, provide estimated effects with confidence intervals from an analysis in which the marker and standard prognostic variables are included, regardless of their significance (for progression risk, includes dysplasia) |
| Discussion | |
| 19 | Interpret the results in the context of the prespecified hypotheses and other relevant studies; include a discussion of limitations of the study. |
| 20 | Discuss implications for future research and clinical value. |

Supplementary table 4: Genome Wide Association Studies (GWAS) and Barrett's Esophagus susceptibility

| Study | LOE | Variant | Gene | EV | Phenotype and OR  (95% CI) | p | Ethnicity | Methodology | Phenotype (n) | Quality: REMARK + notable issues |
| --- | --- | --- | --- | --- | --- | --- | --- | --- | --- | --- |
| Levine 2013 | C | rs2687201  rs11789015  rs6479527  rs10419226  rs10423674 | FOXP1  BARX1  PTPDC1  CRTC1  CRTC1 | T  G  T  A  T | BEA 1.18 (1.10–1.26)  BE/EACA 1.18 (1.12–1.25)  BEA 0.85 (0.79–0.91)  BE/EACA 0.83 (0.79–0.88)  BEA 0.88 (0.82–0.93)  BE/EACA 0.87 (0.82–0.91)  BEA 1.19 (1.12–1.26)  BE/EACA 1.18 (1.12–1.24)  BEA 0.85 (0.80–0.91)  BE/EACA 0.84 (0.80–0.89)  A-age, sex, principal component analysis, polymorphisms | 2.00×10−6  5.47×10−9  5.08×10−6  1.02×10−9  4.74×10−5  5.84x10−8  5.54×10−8  3.55×10−10  1.92×10−6  1.75×10−9 | Caucasian European | Multistage GWAS  Pro/retro archived | BEIM (3,175) EAC (2,390)  Controls (10,120) | 15/17  Incomplete adjustment for clinical risk factors |
| Su 2012 [29](#_ENREF_29)  Palles 2015 | C | rs9257809  rs9936833  rs3072  rs2701108 | MHC region  FOXF1  *GDF7*  *TBX5* | A  C | BEA 1.21 (1.13-1.28)  BE 1.14 (1.10-1.19)  BEA 1.14 (1.09-1.18)  BEA 0.90 (0.86-0.93)  A-Principal component analysis, polymorphisms | 4.09x10-9  2.74x10-10  1.75x10-11  7.48x10-9 | Caucasian European | Multistage GWAS  Pro/retro archived | BE (7,838)  Controls (17,997) | 15/17  Incomplete adjustment for clinical risk factors |

LOE=level of evidence; EV=effect variant; OR=odds ratio; CI=confidence interval; IM=intestinal metaplasia; BE=Barrett’s esophagus; EAC=esophageal adenocarcinoma

Supplementary table 5: Candidate polymorphisms and Barrett's Esophagus Susceptibility

| Study | LOE | Variant | Gene | EV | Phenotype and OR (95% CI) | p | Ethnicity | Methodology | Phenotype (n) | QC  REMARK  Notable issues |
| --- | --- | --- | --- | --- | --- | --- | --- | --- | --- | --- |
| Ren 2014 [39](#_ENREF_39) | C | rs3756311  rs3776082  rs2237091  rs717746  rs3776083  rs4769585  rs3812863  rs2504211  rs1805107  rs2481952  rs9257809  rs9936833 | CDX1  CDX1  CDX1  CDX1  CDX1  CDX2  CDX2  CDX2  CDX2  CDX2  MHC region  FOXF1 | AA  AA  AA  GG  AG  CT  AG  TT  AA  TT  AG  CC | BE 0.77 (0.37–1.57)  BE 4.02 (1.80–9.00)  BE 0.28 (0.13–0.59)  BE 3.65 (1.73–7.69  BE 1.91 (1.09–3.33)  BE 2.68 (1.20–5.98)  BE 2.53 (1.24–5.14)  BE 0.37 (0.10–1.40)  BE 2.45 (0.65–9.32)  BE 1.77 (0.86–3.64)  BE 1.05 (0.49–2.23)  BE 1.52 (0.75–3.10) | 0.460  <0.005  <0.005  <0.005  0.02 (NS)  0.02 (NS)   - 1. (NS)   0.140  0.190  0.120  0.900  0.250 | Caucasian (USA) | Candidate  Prospective | BE (109)  Controls GERD (223) | 13.5/18  No adjustment for clinical risk factors |
| Izakovicova-Holla 2013  [24](#_ENREF_24) |  | rs1800587  rs16944  rs1143634  VNTR polymorphism  rs1800587/rs16944/rs1143634/IL1RN  rs1800587/rs16944/rs1143634/IL1RN | IL1A  IL1B  IL1B  IL1RN | T  TT  T  1/2  C/T/C/L  T/C/C/L | BE 0.86 (0.54–1.37)  BE 1.12 (0.42–2.96)  BE 0.56 (0.33-0.93)  BE 0.62 (0.42–0.94)  BE 1.95 (1.09-1.30)  BE 2.67 (1.15-6.24) | >0.05  >0.05  0.016 (NS)  0.015 (NS)  0.03 (NS)  0.02 (NS) | Caucasian (Czeck) | Candidate  Prospective | BE (60)  ControlsM (165) | 14/18  No adjustment for clinical risk factors |
| Menke 2012a [17](#_ENREF_17) | C | rs4444903 | EGFR | GG | BEA 3.0 (1.5-6.2)  A- Age, sex | 0.002 | Caucasian (Netherlands)* | Candidate  retro archived | BE (246)  Controls (198) | 14.5/18  No call rate |
| Menke 2012b [40](#_ENREF_40) | C | rs909253 | TNFB | AA | BEA: 1.98 (1.03–3.81)  A- Age, sex | 0.04 (NS) | Caucasian (Netherlands)* | Candidate  Retro archived | BE (257)  Controls (197) | 14.5/18 |
| Menke 2012c  [41](#_ENREF_41) | C | rs2305764 | MyoPb | GG | BEA: 2.96 (1.10–7.99)  A- Age, sex | 0.032 (NS) | Caucasian (Netherlands)* | Candidate  Retro archived | BE (254)  Controls (198) | 13.5/18 |
| Babar 2012[26](#_ENREF_26) |  | rs917997  rs1946518  rs187238 | IL18RAP  IL18  IL18 | CC  CC  GG | BEA: 0.59 (0.43–0.80)  BEA: 1.45 (1.07–1.98)  BEA: 1.25 (0.92–1.70)  A-polymorphisms | 6.00x10-4  0.02 (NS)  0.160 | Caucasian (Irish)** | Candidate  Retro archived | BE (213)  ControlsM (242) | 15.5/18  No adjustment for clinical risk factors |
| van de Winkel 2011[42](#_ENREF_42) | C | rs6785049  rs2276707  rs3814055 | PXR  PXR  PXR | G  T  T | BE 1.36 (1.03-1.79)  BE 1.44 (0.99-2.10)  BE NP | <0.05 (NS?)  >0.05  >0.05 | Caucasian (Netherlands)* | Candidate  Retro archived | BEIM (249)  Controls (201) | 11.5/18  No adjustment for clinical risk factors |
| Ekiz 2012[43](#_ENREF_43) | C | rs1801133  rs1801133 | MTHFR  MTHFR | TT | BEEx 2.29 (0.27-19.7)  BEEx 0.78 (0.06-10.4) | 0.452Ex  0.855Ex | Turkish | Candidate  Retro archived | BE (14)  Controls (30) | 11/18  No adjustment for clinical risk factors |
| Orloff 2011[44](#_ENREF_44) |  | rs41341748  rs387906645  rs146370051  rs387907029 | MSR1  MSR1  ASCC1  CTHRC1 | T  G  G  C | BE/EAC: 6.9-v-0.00%  OREx 16.8 (0.98-289)  BE/EAC: 1.7-v-0.00%  OREx 6.09 (0.29-128.2)  BE/EAC: 2.1-v-0.00%  BE/EACEx 6.71 (0.32-141.5)  BE/EAC: 1.4-v-0.00%  OREx 4.33 (0.21-90.7) | <0.01  0.052 Ex  0.190  0.245Ex  0.180  0.221Ex  0.500  0.347Ex | Caucasian  (USA) | Candidate/ linkage analysis  retro archived | BE/EAC (116)  ControlsM (139) | 7/18  No HWE  No call rate  No adjustment for clinical risk factors |
| McElholm 2010 [18](#_ENREF_18) |  | rs6214  IGF-1 (CA)n  rs6898743  rs10860865, rs10860869, rs12821878, rs2195239, rs2946834, rs7136446  rs2230949, rs3213221, rs3741212  rs2132571, rs2132572, rs2270628, rs2453839, rs2471551, rs2854744, rs2854746, rs3110697, rs6413441, rs9282734  rs10794486, rs11630259, rs11633717, rs11854132, rs12440962, rs12916884, rs1357112, rs1464430, rs1513643, rs1879612, rs1879613, rs2139924, rs2251687, rs2593053, rs2684789, rs2684791, rs2684792, rs2684794, rs2684799, rs2684806, rs2684807, rs2684808, rs2684811, rs2715416, rs2715417, rs2715419, rs2715425, rs2715428, rs2871866, rs3138594 (TCC), rs33958176, rs34516635, rs3743253, rs3784606, rs4965430, rs4965438, rs4966009, rs4966012, rs4966035, rs4966042, rs4966043, rs4966044, rs6598554, rs7166348, rs7166558, rs7169544, rs8026157, rs8027457, rs8027767, rs8030777, rs8033670, rs8035410, rs867431, rs883149, rs951715  rs2001345, rs2005172, rs2665802, rs2854184  rs12153009, rs12233949, rs17575164, rs1862628, rs4129472, rs4130113, rs4866941, rs6180, rs6451624, rs6898743, rs7444761, rs7702524, rs7703713 | IGF1  IGF1  GHR  IGF1  IGF2  IGFBP3  IGF1R  GH  GHR | AA  17/-  CG | BEA: 0.43 (0.24-0.75)  BE: NP  BE: NP  BE: NP  A-age, sex, WHR | 3.00x10-3  NS  NS  NS | Caucasian (Irish)** | Candidate  retro archived | BEIM (224)  ControlsM (260) | 15.5/18  Incomplete call rate |
| Kadioglu 2010 [16](#_ENREF_16) | C | Null  rs4880  rs1052133 | GSTM1  SOD2  OGG1 | Null  T  G | BEA 1.53 (0.62 – 3.82)  BEA 0.86 (0.29 – 2.52)  BEA 2.30 (0.93 – 5.69)  A-age, sex, BMI, smoking, alcohol | 0.356  0.785  0.07 | Turkish | Candidate  Prospective | BEIM (40)  Control (40) | 13/18 |
| Bradbury 2009 [45](#_ENREF_45) |  | rs1799750  rs3025058  rs2276109  rs652438 | MMP1  MMP3  MMP12  MMP12 | GG  Del/  GG  AG | BEA 2.21 (1.08–4.53)  BEA 1.37 (0.68–2.74)  BEA 4.47 (0.72–27.6)  BEA 1.26 (0.60–2.62)  A-age, gender, smoking, BMI | 0.03 (NS)  0.380  0.110  0.540 | Caucasian (USA) | Candidate  Retrospective archived | BEIM (99)  ControlsM (455) | 16/18 |
| Macdonald 2009[19](#_ENREF_19) | C | rs2229765 + BMI>30 | IGF1R | A | BEA: 3.11 (1.12-8.63)  A-age, gender | <0.05 (NS?) | NP (Canada) | Candidate  Retro archived | BEIM (126)  ControlsM (95) | 12.5/18 |
| Gaj 2008[27](#_ENREF_27) | C | rs11209026  rs1884444, rs10889677  rs2066842, rs2066844, rs2066845, rs5743293  rs1050152  rs2631367  rs1248696  rs2241880 | IL23R  IL23R  CARD15  OCTN1  OCTN2  DLG5  ATG16L1 | A | BE: 3.49 (1.37-8.90)  BE (NP) | 0.011 (NS)  NS | Caucasians (Polish) | Candidate  Prospective | BE (34)  Controls (139) | 10.5/18  No adjustment for clinical risk factors |
| Corley 2008 [46](#_ENREF_46) | C | rs1799945  rs1800562 | HFE  HFE | CG  GA | BEA 1.21 (0.83–1.77)  BEA-v-RE 1.39 (0.94-2.05)  BE NP  A-age, sex, smoking, ethnicity | NP  NP  NP | Caucasian/Hispanic/ African-American /Asian | Candidate retro archived | BEIM (317)  Controls: healthy, (308), RE (306) | 10/18  HWE ✗  Call rate✗ |
| Ferguson 2008a [47](#_ENREF_47) | C | rs5275  rs2297598 | PTGS2  NOS2 | C  T | BEA 1.12 (0.77-1.65)  BEA 0.92 (0.61-1.40)  A-age, sex, education, BMI, smoking, alcohol, symptoms | 0.530  0.750 | Caucasian (Irish)** | Candidate retro archived | BEIM (124)  ControlsM (260) | 15/18 |
| Ferguson 2008b[48](#_ENREF_48) | C | rs1052133  rs25487  rs13181 | OGG1  XRCC1  ERCC2 | G  TT  CC | BEA 0.96 (0.65-1.41)  BEA 1.01 (0.55-1.87)  BEA 1.14 (0.64-2.04)  A-age, sex, education, BMI, smoking, alcohol, symptoms | NS  NS  NS | Caucasian (Irish)** | Candidate retro archived | BEIM (124)  ControlsM (260) | 15/18 |
| Moons 2008 [23](#_ENREF_23) | C | rs3212227  rs1800872  rs1800871  rs1800896  rs4073  rs1800795  rs2069762 | IL12B  IL10C  IL10C  IL10C  IL8  IL6  IL2 | C  C  C  G  A  C  G | BE-v-REA 1.82 (1.17-2.69)  BE-v-REA 1.10A (0.74–1.63)  BE-v-REA 1.10 (0.74–1.63)  BE-v-REA 0.77 (0.55–1.08)  BE-v-REA 0.86 (0.66–1.14)  BE-v-REA 1.07 (0.76–1.33)  BE-v-REA 0.95 (0.70–1.28)  A-polymorphisms, age, sex, HH | 7.00x10-3  0.647  0.647  0.127  0.291  0.956  0.713 | Caucasian (Netherlands)* | Candidate retro archived | BEIM (255)  Controls: RE (247) | 15/18 |
| Moons 2007 |  | rs20417  rs689466 | PTGS2  PTGS2 | CC  GG | BE-v-REEx 8.61 (0.46-160)  BE-v-REEx 1.44 (0.63-3.27) | 0.150Ex  0.386Ex | Caucasian (Netherlands)* | Candidate retro archived | BEIM (255)  Controls: RO (240) | 13/18  No HWE  No adjustment for clinical risk factors |
| Pilger 2007[49](#_ENREF_49) | C | rs1800372  rs1625895 | P53  P53 | G  A | BEEx 3.69 (0.61-22.2)  BEEx 0.47 (0.12-1.76) | 0.153Ex  0.261Ex | NP (Brazil) | Candidate  Prospective | BE (16)  Controls (100) | 10.5/18  No adjustment for clinical risk factors |
| di Martino 2007 [50](#_ENREF_50) | C | rs1800566  rs4880 | NQO1  SOD2 | T  TT | BEA: 0.34 (0.05–2.25)  BEA-v-RE 0.22 (0.07–0.76)  BEEx 1.60 (0.94-2.70)  BE-v-REEx 0.86 (0.52-1.41)  A-age, sex, symptoms, smoking, BMI | 0.364  0.016 (NS)  0.081Ex  0.543Ex | NP (UK) | Candidate  Prospective? | BEIM (200)  RE (146)  Controls (94) | 13.5/18 |
| Kala 2007 | C | Null  Null  rs1695 | GSTM1  GSTT1  GSTP | Null  Null  G | BE 0.51 (0.29-1.29)  BE 1.50 (0.57 – 3.94)  BE: 4.25 (1.42 – 12.72) | NS  NS  6.70x10-3 | Caucasian (Czeck) | Candidate  Prospective? | BE (22)  Controls (173) | 14/18  No adjustment for clinical risk factors |
| Murphy 2007 | C | rs6591255  rs6591256  rs1695  rs749174  rs1138272  rs947895  rs4880  rs3798215  rs1967802  rs4902346  rs2737844 | GSTP1  GSTP1  GSTP1  GSTP1  GSTP1  GSTP1  SOD2  SOD2  SOD2  GPX2  GPX2 | T  G  G  G  T  A  C  G  G  G  T | BE: 1.25 (0.79–1.99)  BE 1.14 (0.72–1.83)  BE 1.07 (0.70–1.62)  BE 1.14(0.75–1.73)  BE 1.18(0.67–2.07)  BE 1.30(0.85–1.97)  BE 1.06 (0.67–1.69)  BE 0.90 (0.59–1.35)  BE 1.04 (0.68–1.57)  BE 0.96 (0.62-1.47)  BE 0.97 (0.65–1.46) | 0.610  0.820  0.930  0.610  0.700  0.38  0.75  0.11  0.69  0.75  0.99 | Caucasian (Irish)** | Candidate retro archived | BEIM (189)  ControlsM  (223) | 15/18  No adjustment for clinical risk factors |
| Casson 2006 [51](#_ENREF_51) |  | Null  Null  rs1695  rs1051740  rs2234922 | GSTM1  GSTT1  GSTP1  EPHX1  EPHX1 | Null  Null  TT  CC  GG | BEEx 1.00 (0.564-1.66)  BEEx 1.33 (0.66-2.70)  BEEx 0.94 (0.39-1.26)  BEEx 0.77(0.37-1.60)  BEEx 0.24 (0.06-0.95) | 0.901Ex  0.423Ex  0.891 Ex  0.486 Ex  0.043 Ex (NS) | NP  (Canada)*** | Candidate  Prospective? | BEIM (125)  ControlsM (95) | 13/18  No adjustment for clinical risk factors |
| Casson 2005 a[28](#_ENREF_28) |  | rs9344 | CCND1 | AA | BEA 3.69 (1.46–9.29)  A-age, gender | <0.05 (NS?) | NP  (Canada)*** | Candidate Prospective | BEIM (125)  ControlsM (95) | 13/18 |
| Rajendra 2005 [52](#_ENREF_52) |  | A  B  B  C  DR  DQ | HLA  HLA  HLA  HLA  HLA  HLA | -  B7  -  -  -  - | NP  16.9%-v-0.00%  BEEx  21.4 (1.22-372)  NS | NS  0.0006 (Chi)  0.036 (NS)  NS | Asian  (India) | Candidate  Prospective | BE (IM) (59)  Controls (60) | 11.5/18  No adjustment for clinical risk factors |
| Casson 2005b [53](#_ENREF_53) |  | PAT  rs238406  rs13181  rs1799782  rs25487  rs861539 | XPC  ERCC2  ERCC2  XRCC1  XRCC1  XRCC3 | Ins  AA  CC  CT  AA  TT | BEA 1.64 (0.71–3.76)  BEA 2.03 (0.97–4.27)  BEA 0.62 (0.28–1.40)  BEA 1.13 (0.41–3.16)  BEA 0.38 (0.12–0.64)  BEA 1.04 (0.45–2.43)  A-age, gender, smoking, alcohol | NP  NP  NP  NP  <0.05 (NS?)  NP | NS  (Canada)*** | Candidate Prospective | BEIM (125)  ControlsM (95)) | 13/18 |
| Gough 2005  [25](#_ENREF_25) |  | rs419598  rs16944  rs415958 / rs16944  rs1800896  rs1801275  rs361525 | IL1RA  IL1B  IL1RA / IL1B  IL10  IL4R  TNFA | CC  AA  CC/A  CC  GG  AA | BE 3.04 (0.81-11.5)  BEEx 1.14 (0.55-2.36)  BE 9.5 (1.19-75.9)  BE 1.84 (1.04-3.28)  BE 3.07 (NP)  BE 0.75 (0.35-1.60) | 0.08  0.718Ex  0.01 (NS)  0.035 (NS)  0.149  0.454 | NS (UK) | Candidate  Prospective | BEIM (53)  Controls: RE (153) | 123/18  No HWE  No call rate  No adjustment for clinical risk factors |
| van Lieshout  1999 [54](#_ENREF_54) |  | Null  Null  rs1695  rs1048943  rs4646903 | GSTM1  GSTT1  GSTP1  CYP1A1  CYP1A1 | Null  Null  GG  CC  CC | BEEx 0.73 (0.45-1.16)  BE Ex 1.33 (0.76-2.32)  BE Ex 2.48 (1.05-5.81)  BE Ex 3.46 (0.76-15.8)  BE Ex 0.84 (0.09-8,16) | 0.184Ex  0.318 Ex  0.038 Ex (NS)  0.108Ex  0.879Ex | Caucasian (Netherlands) | Candidate  Prospective | BE (98)  Controls (247) | 10/18  No HWE  No adjustment for clinical risk factors |
| Meta-analysis | | | | | | | | | | |
| Bull 2009[14](#_ENREF_14) | NA | rs1695  Null  Null | GSTP1  GSTM1  GSTT1 | G  Null  Null | BE 1.50 (1.16-1.95)  BE 0.77 (0.56–1.08)  BE 1.35 (0.91-2.01) | <0.01  NS  NS | Mixed | Meta-analysis of 4 studies | BE (389)  Controls (832) | NA |

L=long; Ex=extrapolated; WHR=waist hip ratio; BMI=body mass index; HWE=Hardy Weinberg equilibrium; NP=not presented; NS=non-significant; NA=not applicable; IM=intestinal metaplasia; M=matched; */**/***/****overlapping study populations; HH=hiatus hernia

Supplementary table 6: Modified REMARK scores for studies assessing susceptibility variants

| Study | Modified REMARK criteria scores | | | | | | | | | | | | | | | | | | | |  |
| --- | --- | --- | --- | --- | --- | --- | --- | --- | --- | --- | --- | --- | --- | --- | --- | --- | --- | --- | --- | --- | --- |
| 1 | 2 | 3 | 4 | 5 | 6 | 7 | 8 | 9 | 10 | 11 | 12 | 13 | 14 | 15 | 16 | 17 | 18 | 19 | 20 | Total |
| GWAS susceptibility | | | | | | | | | | | | | | | | | | | | | |
| Levine 2013 | 1 | 1 | NA | 1 | 0.5NB | 1 | 0.5NM | NA | 1 | 1 | 1 | 1 | 1 | 0.5 | 0.5 | NA | 0.5 | 1 | 1 | 1 | 14.5 |
| Su 2012 | 1 | 1 | NA | 1 | 0.5NB | 1 | 0.5NM | NA | 1 | 1 | 1 | 1 | 1 | 0.5 | 0.5 | NA | 0.5 | 1 | 1 | 1 | 14.5 |
| Candidate susceptibility | | | | | | | | | | | | | | | | | | | | | |
| Ren 2014 [39](#_ENREF_39) | 1 | 1 | NA | 1 | 0.5NB | 0.5NR | 0NM | NA | 1 | 0 | 0.5MC | 1 | 1 | 1 | 0.5 | 1 | 0.5 | 1 | 1 | 1 | 13.5 |
| Izakovicova-Holla 2013  [24](#_ENREF_24) | 1 | 1 | NA | 0.5S | 1 | 0.5NR | 1 | NA | 1 | 1 | 0.5MC | 1 | 1 | 1 | 0.5 | 1 | 0.5 | 1 | 1 | 1 | 14 |
| Menke 2012a [17](#_ENREF_17) | 1 | 1 | NA | 0.5S | 1 | 0NR,CR | 0.5NM | NA | 1 | 1 | 1 | 1 | 1 | 1 | 0.5 | 1 | 0.5 | 1 | 1 | 1 | 14.5 |
| Menke 2012b [40](#_ENREF_40) | 1 | 1 | NA | 0.5S | 1 | 0.5NR | 0.5NM | NA | 1 | 1 | 0.5MC | 1 | 1 | 1 | 0.5 | 1 | 0.5 | 1 | 1 | 1 | 14.5 |
| Menke 2012c  [41](#_ENREF_41) | 1 | 1 | NA | 1 | 1 | 0NR | 0.5NM | NA | 1 | 1 | 0.5MC | 1 | 1 | 1 | 0.5 | 0 | 0.5 | 1 | 1 | 1 | 13.5 |
| Babar 2012[26](#_ENREF_26) | 1 | 1 | NA | 1 | 1 | 1 | 1 | NA | 1 | 0 | 0.5MC | 1 | 1 | 1 | 0.5 | 1 | 0.5 | 1 | 1 | 1 | 15.5 |
| van de Winkel 2011[42](#_ENREF_42) | 1 | 0.5 | NA | 0.5S | 0.5NB | 0.5NR | 0NM | NA | 1 | 1 | 0.5MC | 1 | 1 | 1 | 0.5 | 0.5 | 1 | 0 | 0 | 1 | 11.5 |
| Ekiz 2012 ([43](#_ENREF_43) | 1 | 1 | NA | 1 | 0.5NB | 0.5NR | 0NM | NA | 1 | 0 | 0.5MC | 1 | 1 | 1 | 0.5 | 0 | 0 | 0 | 1 | 1 | 11 |
| Orloff 2011[44](#_ENREF_44) | 1 | 0.5 | NA | 0S | 0NB | 0NR | 0NM | NA | 1 | 0 | 0.5MC | 1 | 1 | 0 | 0 | 0 | 0 | 0 | 1 | 1 | 7 |
| McElholm 2010 [18](#_ENREF_18) | 1 | 1 | NA | 1 | 1 | 0.5CR | 1 | NA | 1 | 1 | 1 | 1 | 1 | 1 | 0.5 | 0 | 0.5 | 1 | 1 | 1 | 15.5 |
| Kadioglu 2010 [16](#_ENREF_16) | 1 | 1 | NA | 1 | 0.5NB | 0.5NR | 0 NM | NA | 1 | 0 | 1 | 1 | 1 | 1 | 0.5 | 0 | 0.5 | 1 | 1 | 1 | 13 |
| Bradbury 2009 [45](#_ENREF_45) | 1 | 1 | NA | 1 | 1 | 1 | 1 | NA | 1 | 0 | 1 | 1 | 1 | 1 | 0.5 | 1 | 0.5 | 1 | 1 | 1 | 16 |
| Macdonald 2009[19](#_ENREF_19) | 1 | 1 | NA | 1 | 1 | 1 | 1 | NA | 1 | 0 | 0.5MC | 0 | 1 | 0.5 | 0 | 0 | 0.5 | 1 | 1 | 1 | 12.5 |
| Gaj 2008[27](#_ENREF_27) | 1 | 0.5 | NA | 0.5S | 0.5NB | 0.5NR | 0 NM | NA | 1 | 0 | 0.5MC | 1 | 1 | 1 | 0.5 | 0.5 | 0 | 0 | 1 | 1 | 10.5 |
| Corley 2008 [46](#_ENREF_46) | 1 | 1 | NA | 0S | 0NB | 0NR | 0NM | NA | 1 | 0 | 0.5MC | 0.5 | 1 | 1 | 0.5 | 0 | 0.5 | 1 | 1 | 1 | 10 |
| Ferguson 2008a [47](#_ENREF_47) | 1 | 1 | NA | 0.5S | 1 | 1 | 1 | NA | 1 | 1 | 0.5MC | 1 | 1 | 1 | 0.5 | 1 | 0.5 | 1 | 1 | 1 | 15 |
| Ferguson 2008b[48](#_ENREF_48) | 1 | 1 | NA | 0.5S | 1 | 1 | 1 | NA | 1 | 1 | 0.5MC | 1 | 1 | 1 | 0.5 | 1 | 0.5 | 1 | 1 | 1 | 15 |
| Moons 2008 [23](#_ENREF_23) | 1 | 1 | NA | 0.5S | 0.5NB | 0.5NR | 0.5NM | NA | 1 | 1 | 1 | 1 | 1 | 1 | 1 | 0 | 1 | 1 | 1 | 1 | 15 |
| Moons 2007[69](#_ENREF_69) | 1 | 1 | NA | 0.5S | 0.5NB | 0NR, HWE | 0.5NM | NA | 1 | 1 | 0.5MC | 1 | 1 | 1 | 0.5 | 0 | 0.5 | 1 | 1 | 1 | 13 |
| Pilger 2007[49](#_ENREF_49) | 1 | 1 | NA | 0.5S | 0.5NB | 0.5NR | 0.5NM | NA | 1 | 0 | 0.5MC | 1 | 1 | 1 | 0 | 0 | 0 | 0 | 1 | 1 | 10.5 |
| di Martino 2007 [50](#_ENREF_50) | 1 | 1 | NA | 0.5S | 0.5NB | 1 | 0.5NM | NA | 1 | 0 | 0.5MC | 1 | 1 | 1 | 0.5 | 0.5 | 0.5 | 1 | 1 | 1 | 13.5 |
| Kala 2007 [15](#_ENREF_15) | 1 | 1 | NA | 0.5S | 0.5NB | 1 | 0.5NM | NA | 1 | 1 | 1 | 1 | 1 | 1 | 0.5 | 1 | 0 | 0 | 1 | 1 | 14 |
| Murphy 2007[70](#_ENREF_70) | 1 | 1 | NA | 1 | 1 | 0.5NR | 1 | NA | 1 | 1 | 1 | 1 | 1 | 1 | 0.5 | 0 | 0.5 | 1 | 1 | 1 | 15 |
| Casson 2006 [51](#_ENREF_51) | 1 | 1 | NA | 0.5S | 1 | 1 | 0.5NM | NA | 1 | 0 | 0.5MC | 1 | 1 | 1 | 0.5 | 0 | 0.5 | 0.5 | 1 | 1 | 13 |
| Casson 2005 a[28](#_ENREF_28) | 1 | 1 | NA | 0.5S | 0.5NB | 1 | 0.5NM | NA | 1 | 0 | 0.5MC | 1 | 1 | 1 | 0.5 | 0 | 0.5 | 1 | 1 | 1 | 13 |
| Rajendra 2005 [52](#_ENREF_52) | 1 | 1 | NA | 0.5S | 0.5NB | 0.5NR | 0.5NM | NA | 1 | 1 | 0MC | 1 | 1 | 1 | 0.5 | 0 | 0 | 0 | 1 | 1 | 11.5 |
| Casson 2005b [53](#_ENREF_53) | 1 | 1 | NA | 0.5S | 0.5NB | 1 | 0.5NM | NA | 1 | 0 | 0.5MC | 1 | 1 | 1 | 0.5 | 0 | 0.5 | 1 | 1 | 1 | 13 |
| Gough 2005  [25](#_ENREF_25) | 1 | 1 | NA | 1 | 0.5NB | 0.5NR | 0.5NM | NA | 1 | 1 | 0.5MC | 1 | 1 | 1 | 0.5 | 0.5 | 0 | 0 | 1 | 1 | 13 |
| van Lieshout  1999 [54](#_ENREF_54) | 1 | 1 | NA | 1 | 0.5NB | 0NR | 0.5NM | NA | 1 | 0 | 0.5MC | 1 | 1 | 1 | 0 | 0 | 0 | 0 | 1 | 1 | 10 |

NM-controls not fully matched; NR-no reproducibility quality controls; CR=no call rate; NB-genotyping not blinded; MC-no or inappropriate adjustment for multiple comparisons; S-no description of sample storage; HWE no assessment of Hardy-Weinberg equilibrium

Supplementary table 7: Germline variants and progression of Barrett's Esophagus

| Study | LOE | Variant | Gene | EV | Phenotype and OR  (95% CI) | p | Ethnicity | Methodology | Phenotype (n) | QC:  REMARK  Notable issues |
| --- | --- | --- | --- | --- | --- | --- | --- | --- | --- | --- |
| Siahpush 2007 [55](#_ENREF_55) | C | IGF1 CA(19)  rs2854744  AGG TNR  3’UTR 2bp del | IGF1  IGFBP3  IGF1R  IGF1R | -/-  -/-  -/-  CC  CC  CC  6/6  6/6  6/6  del/del | EACA 0.5 (0.2-1.8)  AnA 1.1 (0.7-2.9)  TetraA 1.1 (0.4-2.6)  EACA 0.8 (0.4-1.9)  AnA 1.1 2.6 (0.7-9.1)  TetraA 1.6 (0.6-4.1)  EACA 2.3 (0.3-17.5)  AnA 2.6 (0.3-19.7)  TetraA 2.8 (0.4-21.7)  EACA 1.5 (0.5-4.6)  AnA 1.1 1.4 (0.5-4.3)  TetraA 2.3 (0.9-5.9)  A-age, gender, smoking, WHR | NP  NP  NP  NP  NP  NP  NP  NP  NP  NP  NP  NP | NP (USA) | Candidate  Retro archived  Median 5.4 years | EAC (38)  CIN (77)  Controls (239) | 13.5/19  No call rate |

LOE=level of evidence; EV=effect variant; OR=odds ratio; EAC=esophageal adenocarcinoma; CIN=chromosomal instability An=aneuploidy; Tetra=tetraploidy; A=adjusted; NP=not presented

Supplementary table 8: Somatic variants and progression of Barrett's Esophagus

| Study | LOE | Variant | Gene | EV | Phenotype and OR / HR (95% CI) | p | Ethnicity | Methodology | Phenotype (n) | QC  REMARK  Notable issues |
| --- | --- | --- | --- | --- | --- | --- | --- | --- | --- | --- |
| Bird-Lieberman 2012 [33](#_ENREF_33) | C | CIN | NA | CIN (aneuploidy, tetraploid, hypodyploid) | EAC ORA 3.03 (1.57-5.83)  EAC/HGD ORA 3.22 (1.73–6.00)  A-age, sex, year diagnosis, length LGD, other markers | 0.001  <0.001 | NP (Northern Ireland | Candidate retro archived  Mean FU 80.4m | EAC (66)  HGD (23)  ControlsM (291) BEIM | 18.5/19 |
| Paulson 2009[56](#_ENREF_56) | C | CNV | Genome | >70Mbp involved | EAC/CIN HR 4.90 (1.60-14.8) | 4.70x10-3 (NS?) | NP (USA) | Candidate  Retro archived  Median 86.1m FU | EAC (8)  Controls 90  BEIM | 15/19  No call rate  Not adjusted for clinical factors |
| Sikkema 2009[34](#_ENREF_34) | D | CIN | NA | Aneuploidy | HGD/EAC HRA 2.30 (0.80–6.30)  A – Age, sex, LGD | NP | Caucasian (Netherlands) | Candidate retro  Mean FU 88.8 | HGD/EAC (27) ControlsM (27)  BEIM/LGD/HGD | 16/19 |
| Chao 2008[57](#_ENREF_57) | C | CIN | NA | Tetraploidy | EAC HR 1.36 (1.26-1.47) | <0.0001 | NP (USA)* | Candidate retrospective archived  Mean FU 75.6m | EAC (29);  Controls (247)  BE/LGD/HGD | 12.5/19  No call rate  Not adjusted for clinical factors |
| Galipeau 2007[35](#_ENREF_35) | C | LOH  LOH  CIN  CIN  Mutant  Mutant | P53  P16  NA  NA  P53  P16 | LOH  LOH  Tetraploidy  Aneuploidy  Mutant (exon 5-8)  Mutant (exon 2) | EAC HRA 5.4 (2.5–12.0)  EAC HRA 2.4 (1.0–5.5)  EAC HRA 2.9 (1.4–5.9)  EAC HRA 3.4 (1.6–7.1)  A-Age, sex, BE length, markers  EAC HR 7.30 (3.70–14.3)  EAC HR 1.80 (0.80–4.10)  Risk lower in patients with multiple abnormalities, taking NSAIDs | <0.001  0.045  <0.001  0.001  NP (NS MV)  NP | NP (USA)* | Candidate  Retro archived  Median FU 71m | EAC 10yrs (34)  Controls (211)  BEIM/HGD | 14/19 |
| Chao 2006[58](#_ENREF_58) | C | LOH + bleomycin sensitive  LOH + bleomycin sensitive  Mutation | P53  P16  P53  P16 | LOH  LOH  Mutant (NS)  Mutant (NS) | EAC HR 2.69 (0.99-7.31)  EAC HR 2.30 (0.88-5.99)  EAC HR 2.18 (0.66-7.18)  EAC HR 1.28 (0.21-7.65) | 0.053  0.090  0.200  0.790 | NP (USA)* | Candidate  Retro archived  Median FU 76.8m | EAC (27)  Controls (193)  BEIM | 13.5/19  No call rate  Not adjusted for clinical factors |
| Maley 2004[36](#_ENREF_36) | C | LOH  LOH  CIN  Mutant  Mutant | P53  P16  NA  P53  P16 | LOH  LOH  Tetraploidy/aneuploidy  Mutant (exon 5-8)  Mutant (exon 2) | EAC HRA 1.27 (1.07-1.50)  EAC HRA 1.09 (0.99-1.20)  EAC HRA 1.31 (1.07-1.60)  EAC HRA 1.13 (0.89-1.43)  EAC HRA 0.82 (0.50-1.37)  A-adjusted for clone size (fraction cells x length segment (cm)) | <0.01 (NS?)  NP  <0.01 (NS?)  NP  NP | NP (USA)* | Candidate  Retro archived  Median FU 76.8m | EAC (NP)  Controls (NP)  Total (267)  BEIM | 13.5/19 |
| Fang 2004[59](#_ENREF_59) | D | CIN | NA | Aneuploidy/polyploidy | EAC OREx 47.7 (1.60-1423) | 0.026Ex | NP (USA) | Candidate retro  Median FU (NP) | EAC (5)  Controls (7)  BEIM | 10.5/19  Not adjusted for clinical factors |
| Dolan 2003[60](#_ENREF_60) | C | LOH | 17p11-13 | LOH | HGD/EAC OREx 7.00 0.05-953) | 0.458Ex | NP (UK)** | Candidate prospective  Median FU 60m | EAC/D (6)  Controls (42)  BE/LGD | 12.5/19  No call rate  Not adjusted for clinical factors |
| Dolan 2003b[61](#_ENREF_61) | C | Mutation | P53 | Mutant (Exon 5-8) | EAC/Dysplasia OREx 93.0 (2.57-3370) | 0.013Ex | NP (UK)** | Candidate prospective  Median FU 60m | EAC/D (6)  Controls (42)  BE /LGD | 12.5/19  No call rate  Not adjusted for clinical factors |
| Rabinovitch 2001[62](#_ENREF_62) | C | CIN  CIN | NA | Aneuploidy  Tetraploidy≥6% | EAC RR 9.50 (4.90-18.0)  EAC OREx 11.7 (5.05-27.2)  EAC RR 12.0 (6.20, 22.0)  EAC OREx 11.4 (5.46-23.3) | <0.05 (?NS)  <0.001Ex  <0.05 (?NS)  <0.001Ex | NP (USA)* | Candidate retrospective archived  Mean FU 56m | EAC (42)  Controls (307)  BE/LGD/HGD | 12/19  Not adjusted for clinical factors |
| Reid 2001[63](#_ENREF_63) | C | LOH | P53 | LOH | EAC RR 16.0 (6.2-39.0)  EAC OREx 19.2 (7.20-51.3)  HGD/EAC RR 3.60 (1.30-10.0)  HGD/EAC OREx 3.62 (1.15-11.3) | <0.001  <0.001Ex  0.020 (NS)  0.028Ex (NS) | NP (USA)* | Candidate retrospective archived  Mean FU 56m | EAC/HGD (43)  Controls (226)  BE/LGD/HGD | 12.5/19  Not adjusted for clinical factors |
| Reid 2000[8](#_ENREF_8) | C | CIN | NA | Aneuploidy / tetraploidy | EAC OR 11.0 (5.50-21.0) | <0.001 | NP (USA*) | Candidate retrospective archived  Mean FU 47.8m | EAC/HGD (42)  Controls (185)  BE/LGD/HGD | 14/19  Not adjusted for clinical factors |
| Teodori 1998[64](#_ENREF_64) | D | CIN | NA | Aneuploidy | EAC OR Ex 71.4 (2.81-1815) | 0.010Ex | NP (Italy) | Candidate  retrospective  Mean FU 156m | EAC (3)  Controls (27)  BEIM | 12/19  Not adjusted for clinical factors |
| Reid 1992[7](#_ENREF_7) | C | CIN | NA | Aneuploidy / tetraploidy | HGD/EAC OREx 209 (10.4-4211) | 5x10-3 EX | NP (USA)* | Candidate retrospective archived  Mean FU 34m | EAC/HGD (9)  Controls (53)  BE/LGD/HGD | 12/19  Not adjusted for clinical factors |
| James 1989[65](#_ENREF_65) | D | CIN | NA | Aneuploidy | EAC OR Ex 44.1 (1.87-1041) | 0.019Ex | NP (UK) | Candidate retrospective  FU NS | EAC (4)  Controls (51)  BE/LGD | 12/19  Not adjusted for clinical factors |

LOE=level of evidence; EV=effect variant; OR=odds ratio; HR=hazard ratio; CI=confidence interval; BE=Barrett’s esophagus; EAC=esophageal adenocarcinoma; HGD=high grade dysplasia; LGD=low grade dysplasia; IM=intestinal metaplasia; M=matched; NA=not applicable; NP=not presented; NS=non-significant; A=adjusted; Ex=extrapolated; */**Same/overlapping populations; CIN=chromosomal instability; FU=follow up; LOH=loss of heterozygosity; QC=quality controls

Supplementary table 9 – Modified REMARK scores for studies assessing markers of progression

| Study | Modified REMARK criteria scores | | | | | | | | | | | | | | | | | | | |  |
| --- | --- | --- | --- | --- | --- | --- | --- | --- | --- | --- | --- | --- | --- | --- | --- | --- | --- | --- | --- | --- | --- |
| 1 | 2 | 3 | 4 | 5 | 6 | 7 | 8 | 9 | 10 | 11 | 12 | 13 | 14 | 15 | 16 | 17 | 18 | 19 | 20 | Total |
| Germline | | | | | | | | | | | | | | | | | | | | | |
| Siahpush 2007 | 1 | 1 | NA | 1 | 0.5NB | 0.5NR | 0.5NM | 1 | 1 | 0 | 0.5MC | 1 | 1 | 1 | 0 | 0 | 0.5 | 1 | 1 | 1 | 13.5/19 |
| Somatic | | | | | | | | | | | | | | | | | | | | | |
| Bird-Lieberman 2012 | 1 | 1 | NA | 0.5S | 1 | 1 | 1 | 1 | 1 | 1 | 1 | 1 | 1 | 1 | 1 | 1 | 1 | 1 | 1 | 1 | 18.5/19 |
| Dunn 2010 | 1 | 1 | 1 | 0.5S | 1 | 1 | 0.5NM | 1 | 1 | 0 | 1 | 1 | 1 | 1 | 1 | 0 | 1 | 1 | 1 | 1 | 16/20 |
| Paulson 2009 | 1 | 1 | NA | 1 | 0.5NB | 1 | 0.5NM | 1 | 1 | 1 | 0.5MC | 1 | 1 | 1 | 0.5 | 0.5 | 0 | 0.5 | 1 | 1 | 15/19 |
| Sikkema 2009 | 1 | 1 | NA | 0.5S | 1 | 1 | 1 | 1 | 1 | 0 | 0.5MC | 1 | 1 | 1 | 1 | 0 | 1 | 1 | 1 | 1 | 16/19 |
| Chao 2008 | 1 | 1 | NA | 1 | 0.5NB | 1 | 0.5NM | NA | 1 | 0 | 0.5MC | 1 | 1 | 1 | 0 | 1 | 0 | 0 | 1 | 1 | 12.5/19 |
| Prasad 2008 | 1 | 1 | 1 | 1 | 1 | 0.5NR | 0.5NM | 1 | 1 | 1 | 0.5MC | 1 | 1 | 1 | 1 | 1 | 1 | 1 | 1 | 1 | 18.5/20 |
| Prasad 2008b | 1 | 1 | 1 | 1 | 1 | 0.5NR | 0.5NM | 1 | 1 | 0 | 0.5MC | 1 | 1 | 1 | 0.5 | 0 | 0 | 0 | 1 | 1 | 14/20 |
| Galipeau 2007 | 1 | 1 | NA | 0.5S | 0.5NB | 0.5NR | 0.5NM | 1 | 1 | 0 | 0.5MC | 1 | 1 | 1 | 0.5 | 1 | 0.5 | 0.5 | 1 | 1 | 14/19 |
| Chao 2006 | 1 | 1 | NA | 0.5S | 0.5NB | 0.5NR | 0.5NM | 1 | 1 | 0 | 0.5MC | 1 | 1 | 1 | 0 | 1 | 0.5 | 0.5 | 1 | 1 | 13.5/19 |
| Fang 2004 | 1 | 1 | NA | 0.5S | 0.5NB | 0.5NR | 0.5NM | 1 | 1 | 0 | 0.5MC | 1 | 1 | 0 | 0 | 0 | 0 | 0 | 1 | 1 | 10.5/19 |
| Maley 2004 | 1 | 1 | NA | 0.5S | 0.5NB | 0.5NR | 0.5NM | 1 | 1 | 0 | 0.5MC | 1 | 1 | 1 | 0.5 | 0 | 1 | 0.5 | 1 | 1 | 13.5/19 |
| Dolan 2003a | 1 | 1 | NA | 1 | 0.5NB | 0.5NR | 0.5NM | 1 | 1 | 0 | 0.5MC | 1 | 1 | 1 | 0.5 | 0 | 0 | 0 | 1 | 1 | 12.5/19 |
| Dolan 2003b | 1 | 1 | NA | 1 | 0.5NB | 0.5NR | 0.5NM | 1 | 1 | 0 | 1 | 1 | 1 | 1 | 0 | 0 | 0 | 0 | 1 | 1 | 12.5/19 |
| Rabinovitch 2001 | 1 | 1 | NA | 0.5S | 0.5NB | 1 | 0.5NM | 1 | 1 | 0 | 0.5MC | 1 | 1 | 0 | 0 | 1 | 0 | 0 | 1 | 1 | 12/19 |
| Reid 2001 | 1 | 1 | NA | 1 | 1 | 0.5NR | 0.5NM | 1 | 1 | 0 | 0.5MC | 1 | 1 | 0 | 0 | 1 | 0 | 0 | 1 | 1 | 12.5/19 |
| Reid 2000 | 1 | 1 | NA | 1 | 1 | 0.5NR | 0.5NM | 1 | 1 | - | 0.5MC | 1 | 1 | 1 | 0.5 | 1 | 0 | 0 | 1 | 1 | 14/19 |
| Teodori 1998 | 1 | 1 | NA | 0.5S | 0.5NB | 1 | 0.5NM | 1 | 1 | 0 | 0.5MC | 1 | 1 | 1 | 0 | 0 | 0 | 0 | 1 | 1 | 12/19 |
| Reid 1992 | 1 | 1 | NA | 0.5S | 0.5NB | 0.5NR | 0.5NM | 1 | 1 | 0 | 1 | 1 | 1 | 1 | 0 | 0 | 0 | 0 | 1 | 1 | 12/19 |
| James 1989 | 1 | 1 | NA | 1 | 0.5NB | 1 | 0.5NM | 1 | 1 | 0 | 1 | 1 | 1 | 0 | 0 | 0 | 0 | 0 | 1 | 1 | 12/19 |

Supplementary table 10: Somatic variants and progression/recurrence of dysplasia/carcinoma after treatment for dysplastic Barrett's Esophagus

| Study | LOE | Treatment | Variant | Gene | Effect variant | OR / HR  (95% CI) | p | Ethnicity | Methodology | Progression, time (n) | QC  REMARK  Notable issues |
| --- | --- | --- | --- | --- | --- | --- | --- | --- | --- | --- | --- |
| Dunn 2010 [66](#_ENREF_66) | D | Aminolaevulinic acid | CIN | NA | Pre-PDT aneuploidy  4m-post PDT aneuploidy  12m-post PDT aneuploidy | EAC/HGD HRA 0.72 (0.20-2.79  EAC/HGD HRA 4.10 (1.30-13.0  EAC/HGD HRA 3.60 (1.05-12.3)  A-age, sex, markers | 0.660  9.00x10-3  2.90x10-3 | NP (UK) | Candidate retro | EAC/HGD >12m (13)  Controls (17) | 16/20 |
| Prasad 2008 [67](#_ENREF_67) | C | Porfimer sodium PDT + PPI | LOH  LOH  CNV  CNV  CNV  CNV | P53  P16  NA  cMYC  ERBB2  20q13 | Loss (14% cells)  Loss (14% cells)  Gain >1 cMYC, HER2, or 20q13 (5% cells),  Gain (5% cells)  Gain (5% cells)  Gain (5% cells) | EAC/LGD/HDG ORA 1.89 (0.57-7.14)  EAC/LGD/HDG ORA 0.32 (0.10–0.96) EAC/LGD/HDG ORA 1.19 (0.37–3.79)  EAC/LGD/HDG OR 1.07 (0.44–2.56) EAC/LGD/HDG OR 0.60 (0.03–44.00) EAC/LGD/HDG OR 0.50 (0.01–37.49)  A-age, sex, previous EMR, BE length, markers (P53/P16/multiple gains only) | NP  NP  NP | NP  (USA)* | Candidate prospective | EAC/LGD/HGD at 3m; (50)  Controls (75) | 18.5/20 |
| Prasad 2008b[68](#_ENREF_68) | C | Porfimer sodium PDT + PPI | ≥1 of:  LOH  LOH  CNV  CNV  CNV  CNV | P53  P16  NA  cMYC  ERBB2  20q13 | Post-PDT (median 6m)  Loss (14% cells)  Loss (14% cells)  Gain >1 cMYC, HER2, or 20q13 (5% cells),  Gain (5% cells)  Gain (5% cells)  Gain (5% cells) | HGD OR Ex 20.1 (0.83-508)  NB – Not controlled for EMR | 0.065Ex | NP (USA)* | Candidate prospective | HGD; 10m (2)  Controls (22) | 14/20  Not adjusted for clinical factors |

LOE=level of evidence; EV=effect variant; OR=odds ratio; HR=hazard ratio; CI=confidence interval; QC=quality control; NP=not presented; NA=not applicable; A=adjusted; Ex=extrapolated; PDT=photodynamic therapy; LOH=loss of heterozygosity; CNV=copy number variant; CIN=chromosomal instability; EAC=esophageal adenocarcinoma; HGD=high grade dysplasia
